# Supplementary material
Source: PubMed Central journal article supplement (PMC3323026)
Supplement: supp_M111.328203_jbc.M111.328203-1.pdf [file supp_M111.328203_jbc.M111.328203-1.pdf]

Supplementary Table 1. Total nematocyst proteome of *Hydra magnipapillata*.

## 1. Structural Proteins (94 proteins)

## Minicollagens and Proline-rich proteins (27 proteins)

| S.No | Model Name  | Score | Domains                                           | Annotation      |
|------|-------------|-------|---------------------------------------------------|-----------------|
| 1.   | Hma2.216559 | 247   | Polyproline stretch, CRD                          | CPP-1           |
| 2.   | Hma2.234334 | 170   | Proline-rich Extensin, CRD                        | CPP-2           |
| 3.   | Hma2.224938 | 123   | Small proline-rich, Pistil-specific extensin-like | CPP-3           |
| 4.   | Hma2.210169 | 95    | Pistil-specific extensin-like                     | CPP-4           |
| 5.   | Hm-Ncol-1   | 443   | GXY repeat, Proline-rich, CRD                     | Minicollagen-1  |
| 6.   | Hm-Ncol-2   | 311   | GXY repeat, Proline-rich, CRD                     | Minicollagen-2  |
| 7.   | Hm-Ncol-3   | 404   | GXY repeat, Proline-rich                          | Minicollagen-3  |
| 8.   | Hm-Ncol-4   | 531   | GXY repeat, Proline-rich                          | Minicollagen-4  |
| 9.   | Hm-Ncol-5   | 1170  | GXY repeat, Proline-rich, CRD                     | Minicollagen-5  |
| 10.  | Hm-Ncol-6   | 1232  | GXY repeat, Proline-rich, CRD                     | Minicollagen-6  |
| 11.  | Hm-Ncol-7   | 129   | GXY repeat, Proline-rich, CRD                     | Minicollagen-7  |
| 12.  | Hm-Ncol-8   | 359   | GXY repeat, Proline-rich                          | Minicollagen-8  |
| 13.  | Hm-Ncol-9   | 139   | GXY repeat, Proline-rich                          | Minicollagen-9  |
| 14.  | Hm-Ncol-10  | 305   | GXY repeat, Proline-rich, CRD                     | Minicollagen-10 |
| 15.  | Hm-Ncol-12  | 224   | GXY repeat, Proline-rich, CRD                     | Minicollagen-12 |
| 16.  | Hm-Ncol-13  | 417   | GXY repeat, Proline-rich                          | Minicollagen-13 |
| 17.  | Hm-Ncol-14  | 91    | GXY repeat, Proline-rich                          | Minicollagen-14 |
| 18.  | Hm-Ncol-15  | 299   | GXY repeat, Proline-rich, CRD                     | Minicollagen-15 |
| 19.  | Hm-Ncol-16  | 71    | GXY repeat, Proline-rich, CRD                     | Minicollagen-16 |
| 20.  | Hm-Ncol-17  | 110   | GXY repeat, Proline-rich, CRD                     | Minicollagen-17 |
| 21.  | Hma2.225439 | 692   | Gal-lectin/ SUEL lectin with GXY repeat           | Collectin       |
| 22.  | Hma2.222911 | 71    | Gal-Lectin, GXY repeat                            | Collectin       |
| 23.  | Hma2.219592 | 106   | GXY repeat                                        | Minicollagen-21 |
| 24.  | Hma2.221111 | 67    | Proline-rich, extension, CRD                      | CPP-5           |
| 25.  | Hma2.231401 | 202   | GXY repeat, CRD                                   | Minicollagen-18 |
| 26.  | Hma2.229732 | 172   | Proline-rich extensin, Collagen alpha chain       | Minicollagen-19 |
| 27.  | Hma2.228331 | 51    | GXY repeat, coiled-coil, CRD                      | Minicollagen-20 |

## Other ECM motif proteins (47 proteins)

| S.No | Model Name  | Score | Domains                                                                                    | Annotation                                               |
|------|-------------|-------|--------------------------------------------------------------------------------------------|----------------------------------------------------------|
| 1.   | Hma2.208346 | 535   | vWFA                                                                                       | vWFA domain protein                                      |
| 2.   | Hma2.224888 | 869   | vWFA <sup>(2)</sup>                                                                        | vWFA domain protein                                      |
| 3.   | Hma2.217303 | 223   | vWFA, Tyrosinase                                                                           | vWFA - Tyrosinase domain protein                         |
| 4.   | Hma2.225431 | 107   | vWFA, RT superfamily                                                                       | vWFA - RT domain protein                                 |
| 5.   | Hma2.210445 | 61    | vWFA                                                                                       | vWFA domain protein                                      |
| 6.   | Hma2.206870 | 727   | Fibronectin type 2 domain, Kringle-like fold                                               | Fibronectin type 2 domain with metallopeptidase activity |
| 7.   | Hma2.202740 | 1570  | vWFA <sup>(2)</sup>                                                                        | vWFA domain protein                                      |
| 8.   | Hma2.207178 | 415   | vWFA                                                                                       | vWFA domain protein                                      |
| 9.   | Hma2.221706 | 114   | MDN1, AAA ATPase containing vWFA, Zinc finger, C2H2-type, CRD                              | MDN1, AAA ATPase containing vWFA protein                 |
| 10.  | Hma2.208994 | 110   | TSP1 /vWFA domain                                                                          | Thrombospondin, type I with vWFA domain                  |
| 11.  | Hma2.229042 | 85    | Tetraspanin, extracellular domain or large extracellular loop (LEL), CD9/CD37/CD63 antigen | Tetraspanin, extracellular domain protein                |
| 12.  | Hma2.230661 | 155   | Thrombospondin, type 1 repeat <sup>(2)</sup>                                               | Thrombospondin, type 1 repeat protein                    |
| 13.  | Hma2.23247  | 109   | vWFA <sup>(2)</sup> , collagen triple helix <sup>(7)</sup>                                 | vWFA domain protein with collagen triple helix           |
| 14.  | Hma2.214763 | 274   | TSP1 (16), vWFA <sup>(2)</sup>                                                             | Thrombospondin type 1 repeat protein with vWFA domain    |
| 15.  | Hma2.202695 | 260   | vWFA domain, Laminin_I                                                                     | vWFA, Laminin_I domain protein                           |
| 16.  | Hma2.217815 | 206   | AAA ATPase containing vWFA, Concanavalin A-like lectin/glucanase                           | AAA ATPase containing vWFA                               |
| 17.  | Hma2.205498 | 190   | vWFA_subfamily_ECM_rve, Integrase core domain/ Ribonuclease H fold                         | vWFA, Integrase domain protein                           |

|     |             |      |                                                                                                                      |                                                           |
|-----|-------------|------|----------------------------------------------------------------------------------------------------------------------|-----------------------------------------------------------|
| 18. | Hma2.224219 | 1717 | vWFA, ZnMc_astacin-like, PRK09707, putative lipoprotein, PCEMA1                                                      | vWFA, ZnMc, PCEMA1                                        |
| 19. | Hma2.218227 | 269  | TSP1 <sup>(20)</sup> , vWFA <sup>(3)</sup> , GON domain                                                              | TSP1, vWFA, GON domains protein                           |
| 20. | Hma2.203577 | 203  | TSP1 <sup>(2)</sup> , Fibronectin type II, collagen-binding, Concanavalin A-like lectin/glucanase, Kringle-like fold | TSP1 Fibronectin domain protein                           |
| 21. | Hma2.227746 | 318  | Fibronectin Type II, collagen-binding, Kringle-like fold                                                             | Fibronectin Type II-kringle-like domain protein           |
| 22. | Hma2.217614 | 85   | MAM <sup>(14)</sup> , Fibronectin Type II                                                                            | MAM domain protein                                        |
| 23. | Hma2.211325 | 71   | Thrombospondin, type 1 repeat                                                                                        | Thrombospondin, type 1 repeat protein                     |
| 24. | Hma2.232918 | 62   | Thrombospondin, type 1 repeat                                                                                        | Thrombospondin, type 1 repeat protein 3 / PQ rich protein |
| 25. | Hma2.223414 | 105  | SCP_GAPR-1-like, TSP1                                                                                                | SCP-like extracellular with TSP1                          |
| 26. | Hma2.214292 | 2193 | Gal_Lectin <sup>(7)</sup> / SUEL lectin                                                                              | Hepta Gal-lectin                                          |
| 27. | Hma2.218987 | 524  | Gal-lectin/ SUEL lectin                                                                                              | Gal-lectin/ SUEL lectin                                   |
| 28. | Hma2.203002 | 329  | Gal_Lectin <sup>(4)</sup> / SUEL lectin                                                                              | Gal-lectin/ SUEL lectin                                   |
| 29. | Hma2.213810 | 233  | Gal-lectin/ SUEL lectin, CRD                                                                                         | Gal-lectin/ SUEL lectin                                   |
| 30. | Hma2.218989 | 161  | Gal-lectin/ SUEL lectin                                                                                              | Gal-lectin/ SUEL lectin                                   |
| 31. | Hma2.217630 | 489  | D-galactoside/L-rhamnose binding SUEL lectin                                                                         | D-galactoside/L-rhamnose binding SUEL lectin              |
| 32. | Hma2.201706 | 71   | Gal_Lectin, GPCR, family 2, trophophilin                                                                             | Gal_Lectin domain protein                                 |
| 33. | Hma2.229916 | 458  | C-type lectin <sup>(2)</sup>                                                                                         | Madhavi protein                                           |
| 34. | Hma2.226267 | 1214 | SCP_GAPR-1, C-Lectin, SEA, CRD                                                                                       | NOWA                                                      |
| 35. | Hma2.215621 | 2021 | vWFA, SCP_GAPR-1, C-Lectin, CRD                                                                                      | NOWA-like protein                                         |
| 36. | Hma2.206417 | 1453 | C-Lectin                                                                                                             | C-Lectin domain protein                                   |
| 37. | Hma2.228644 | 3151 | C-Lectin, PA14, LamG                                                                                                 | Vimala protein                                            |
| 38. | Hma2.211381 | 366  | SEA domain <sup>(2)</sup> , CRD                                                                                      | SEA domain protein                                        |
| 39. | Hma2.208240 | 130  | Thyroglobulin type I repeat, GON domain, SEA domain                                                                  | Thyroglobulin type I repeat protein                       |
| 40. | Hma2.226676 | 373  | Carbohydrate-binding WSC                                                                                             | Carbohydrate-binding WSC domain protein                   |
| 41. | Hma2.200137 | 261  | Carbohydrate-binding WSC                                                                                             | Carbohydrate-binding WSC domain protein                   |
| 42. | Hma2.206921 | 114  | FA58C/Galactose binding-like                                                                                         | FA58C/Galactose binding-like protein                      |
| 43. | Hma2.206786 | 638  | Pentraxin / LamGL                                                                                                    | Geeta protein                                             |
| 44. | Hma2.224520 | 2690 | TSP1, Fibrinogen ReD, LamGL                                                                                          | Rajukutty protein                                         |
| 45. | Hma2.216773 | 146  | FA58C <sup>(3)</sup> , LamGL <sup>(2)</sup> , TSP1, PLAT/LH2                                                         | Seven domain Protein                                      |
| 46. | Hma2.213412 | 449  | FA58C, LamGL, CUB                                                                                                    | Kragl protein                                             |
| 47. | Hma2.218528 | 179  | Glyco_hydro_16 / Concanavalin A-like lectin/glucanase                                                                | Glycoside Hydrolase 16                                    |

### Glycine-rich Proteins (4 proteins)

| S.No | Model Name  | Score | Domains                                    | Annotation     |
|------|-------------|-------|--------------------------------------------|----------------|
| 1.   | Hma2.228381 | 76    | Glycine/Histidine-rich domain              | Spinalin       |
| 2.   | Hma2.219071 | 88    | Glycine/Glutamine-rich elastic domain, CRD | Cnidoin        |
| 3.   | Hma2.224221 | 945   | --                                         | E rich protein |
| 4.   | Hma2.221195 | 104   | --                                         | G rich protein |

### Other Structural Proteins (16 proteins)

| S.No | Model Name  | Score | Domains                                                                 | Annotation                                    |
|------|-------------|-------|-------------------------------------------------------------------------|-----------------------------------------------|
| 1.   | Hma2.213345 | 776   | Myosin motor domain, type II, Myosin_tail_1                             | Myosin motor domain protein                   |
| 2.   | Hma2.215937 | 323   | Chitin-binding domain type 2 <sup>(3)</sup> , Rhodanese Homology domain | Chitin-binding domain type 2 protein          |
| 3.   | Hma2.209281 | 597   | DKK related Cysteine-rich domain                                        | DKK-3 family protein                          |
| 4.   | Hma2.224574 | 556   | DKK related Cysteine-rich domain                                        | HyDKK3                                        |
| 5.   | Hma2.230887 | 542   | DKK related Cysteine-rich domain                                        | DKK-3 family protein                          |
| 6.   | Hma2.217561 | 138   | Chitin-binding domain type 2 <sup>(4)</sup>                             | Chitin binding protein                        |
| 7.   | Hma2.229697 | 79    | Chitin_bind_3                                                           | Chitin binding protein                        |
| 8.   | Hma2.211682 | 175   | Fascin-like domain                                                      | Fascin-like domain protein (PPOD2 peroxidase) |
| 9.   | Hma2.211683 | 92    | Fascin-like domain                                                      | Fascin-like domain protein                    |
| 10.  | Hma2.205478 | 67    | Fascin-like domain                                                      | Fascin-like domain protein                    |
| 11.  | Hma2.209361 | 3995  | SMC domain (Chromosome segregation ATPases)                             | SMC domain protein                            |
| 12.  | Hma2.209360 | 111   | SMC, Chromosome segregation ATPases                                     | SMC domain protein                            |
| 13.  | Hma2.214493 | 105   | WD40 domain                                                             | WD40 domain protein                           |
| 14.  | Hma2.218222 | 160   | Chitin binding protein, peritrophin-A                                   | Chitin binding protein                        |
| 15.  | Hma2.231049 | 76    | DKK family                                                              | DKK 3 related protein                         |
| 16.  | Hma2.213243 | 55    | WD40 repeat-like/LRR kinase 2 related                                   | WD40 repeat-like protein                      |

## 2. Calcium Modulators (20 proteins)

| S.No | Model Name   | Score | Domains                                                      | Annotation                                            |
|------|--------------|-------|--------------------------------------------------------------|-------------------------------------------------------|
| 1.   | Hma2.228411  | 2218  | MACPF, EGF_Ca                                                | MACPF domain protein                                  |
| 2.   | Hma2.213553  | 595   | MACPF, EGF_Ca                                                | MACPF domain protein                                  |
| 3.   | Hma2.208638  | 129   | MACPF, EGF_Ca                                                | MACPF domain protein                                  |
| 4.   | Hma2.208541  | 739   | EGF-like domain                                              | EGF-like domain protein                               |
| 5.   | Hma2.219065  | 74    | EGF_Ca <sup>(2)</sup>                                        | EGF_Ca domain protein                                 |
| 6.   | Hma2.227350  | 58    | EGF_Ca                                                       | EGF_Ca domain protein                                 |
| 7.   | Hma2.221665  | 84    | EGF_Ca <sup>(4)</sup>                                        | EGF_Ca domain protein                                 |
| 8.   | Hma2.208773  | 407   | MACPF                                                        | MACPF domain protein                                  |
| 9.   | Hma2.212260  | 643   | MACPF, EGF_Ca                                                | MACPF, EGF_Ca domain protein 1                        |
| 10.  | Hma2.224448  | 424   | MAC/Perforin domain, EGF_Ca                                  | MACPF, EGF_Ca domain protein                          |
| 11.  | Hma2.219067  | 197   | EGF_Ca/Type 3, Phospholipase A2, eukaryotic                  | EGF_Ca, Phospholipase A2 domain protein               |
| 12.  | Hma2.210123  | 179   | EGF_Ca                                                       | EGF-Ca domain protein                                 |
| 13.  | Hma2.210121  | 149   | EGF_Ca                                                       | EGF-Ca domain protein                                 |
| 14.  | Hma2.211690  | 148   | EGF-like, type 3/ EGF_Ca <sup>(6)</sup>                      | EGF-Ca domain protein                                 |
| 15.  | Hma2.227218  | 63    | EGF-like, type 3                                             | EGF-like, type 3 protein                              |
| 16.  | Hma2.211693  | 327   | EGF_Ca <sup>(2)</sup> , RT_nLTR, Formate/nitrite transporter | EGF_Ca (2) Formate/nitrite transporter domain protein |
| 17.  | Hma2.211735  | 608   | Annexin (4)                                                  | Annexin                                               |
| 18.  | Hma2.210146  | 584   | Calcium-binding EF-hand, Aldolase superfamily                | Calcium-binding EF-hand protein                       |
| 19.  | XP_002167668 | 353   | EF-hand <sup>(2)</sup>                                       | Nematocalcin                                          |
| 20.  | Hma2.228383  | 143   | Annexin repeats (4), HMW glutenin                            | Annexin repeats protein with HMW glutenin domain      |

## 3. Venoms (55 proteins)

| S.No | Model Name   | Score | Domains                                                                            | Annotation                                 |
|------|--------------|-------|------------------------------------------------------------------------------------|--------------------------------------------|
| 1.   | Hma2.223178  | 771   | Anemone_cytotox                                                                    | Anemone_cytotox protein                    |
| 2.   | Hma2.224206  | 642   | PLA2_bee_venom-like                                                                | PLA2_bee_venom-like protein                |
| 3.   | Hma2.210456  | 281   | PLA2_bee_venom-like                                                                | PLA2_bee_venom-like protein                |
| 4.   | Hma2.227448  | 145   | PLA2_bee_venom-like                                                                | PLA2_bee_venom-like protein                |
| 5.   | Hma2.223740* | 589   | PRK05771, V-type ATP synthase subunit, TM                                          | Toxin precursor                            |
| 6.   | Hma2.210268* | 565   | Toxin precursor Cnidocyst Hemolysis signal-A-sequence, TM                          | Toxin precursor                            |
| 7.   | Hma2.209939  | 61    | Metridin-like ShK toxin                                                            | ShK toxin domain protein                   |
| 8.   | Hma2.217198  | 371   | ZnMc_astacin-like, ShKT toxin                                                      | ShKT toxin domain protein                  |
| 9.   | Hma2.212832  | 233   | ZnMc_astacin-like, ShKT toxin                                                      | ShKT toxin domain protein                  |
| 10.  | Hma2.228188  | 51    | ZnMc_astacin-like, ShKT toxin                                                      | ShKT toxin domain protein                  |
| 11.  | Hma2.227742* | 2201  | Fibronectin Type 2                                                                 | FN2 domain protein (toxin)                 |
| 12.  | Hma2.228615  | 76    | ZnMc_astacin-like, Metridin-like ShK toxin                                         | Zinc Metalloproteinase protein             |
| 13.  | Hma2.212831  | 120   | ZnMc_astacin-like, ShK toxin domain                                                | Zinc-dependent metalloproteinase with ShKT |
| 14.  | Hma2.226192* | 838   | --                                                                                 | Toxin-A protein                            |
| 15.  | Hma2.221138  | 380   | Toxin precursor cnidocyst hemolysis signal a sequencing/ TM                        | Toxin precursor protein 1                  |
| 16.  | Hma2.225641  | 322   | Dipeptidyl peptidase IV/Peptidase S9, prolyl oligopeptidase, Esterases and lipases | Venom dipeptidylpeptidase IV               |
| 17.  | Hma2.226366  | 1374  | SCP <sup>(4)</sup>                                                                 | Tetra SCP protein                          |
| 18.  | Hma2.234447  | 308   | SCP_GAPR-1-like                                                                    | SCP_GAPR-1-like protein                    |
| 19.  | Hma2.231910  | 146   | SCP_GAPR-1-like                                                                    | SCP_GAPR-1-like protein                    |
| 20.  | Hma2.219114  | 77    | SCP_GAPR-1-like                                                                    | SCP_GAPR-1-like protein                    |
| 21.  | Hma2.201457  | 75    | SCP_GAPR-1-like                                                                    | SCP_GAPR-1-like protein                    |
| 22.  | Hma2.226368  | 811   | SCP-like extracellular <sup>(2)</sup>                                              | SCP-like extracellular protein             |
| 23.  | Hma2.207560  | 581   | SCP_GAPR-1-like, Allergen V5/Tpx-1 related                                         | SCP_GAPR-1-like protein                    |
| 24.  | Hma2.204928  | 397   | Allergen V5/Tpx-1 related, SCP-like extracellular                                  | SCP-like extracellular protein             |
| 25.  | Hma2.204927  | 350   | SCP_GAPR-1-like <sup>(2)</sup> Allergen V5/Tpx-1 related                           | SCP_GAPR-1-like protein                    |
| 26.  | Hma2.226365  | 318   | SCP_GAPR-1-like /Allergen V5/Tpx-1 related                                         | SCP_GAPR-1-like protein                    |
| 27.  | Hma2.210044  | 194   | SCP_GAPR-1-like/Allergen V5-Tpx-1 related                                          | SCP_GAPR-1-like protein                    |
| 28.  | Hma2.200735  | 161   | SCP_GAPR-1-like/ Allergen V5/Tpx-1 related                                         | SCP_GAPR-1-like protein                    |
| 29.  | Hma2.221381  | 129   | SCP_GAPR-1-like <sup>(2)</sup>                                                     | SCP_GAPR-1-like protein                    |
| 30.  | Hma2.226361  | 85    | SCP_GAPR-1-like <sup>(2)</sup>                                                     | SCP_GAPR-1-like protein                    |

|     |             |     |                                                                   |                                                           |
|-----|-------------|-----|-------------------------------------------------------------------|-----------------------------------------------------------|
| 31. | Hma2.226363 | 613 | Allergen V5/Tpx-1 related, SCP-like extracellular                 | SCP domain neurofilament-like protein                     |
| 32. | Hma2.231443 | 176 | SCP_GAPR-1-like, Transposase_1, COG3415                           | SCP COG3415 domain protein                                |
| 33. | Hma2.230680 | 648 | WD40, DUF938, Methyltransf_12, Cytosolic fatty-acid binding       | WD40 domain protein                                       |
| 34. | Hma2.225244 | 416 | BPTI / Kunitz family, Thyroglobulin type I repeats <sup>(3)</sup> | BPTI / Kunitz family, Thyroglobulin type I repeat protein |
| 35. | Hma2.221663 | 102 | EGF_Ca <sup>(4)</sup>                                             | EGF_Ca domain protein                                     |
| 36. | Hma2.231922 | 343 | EGF_Ca                                                            | EGF-Ca domain protein                                     |
| 37. | Hma2.227484 | 156 | FA58C, EGF_Ca, CCP (2), HYR, GCC2_GCC3                            | Penta domain protein                                      |
| 38. | Hma2.219403 | 122 | EF-hand <sup>(2)</sup>                                            | EF-hand, calcium binding motif protein                    |
| 39. | Hma2.221233 | 75  | EF-hand <sup>(2)</sup>                                            | EF-hand, calcium binding motif protein                    |
| 40. | Hma2.215087 | 473 | ZnMc_astacin_like                                                 | Zinc Metallopeptidase protein                             |
| 41. | Hma2.220229 | 96  | ZnMc_astacin_like                                                 | Zinc Metallopeptidase protein                             |
| 42. | Hma2.234459 | 59  | ZnMc_astacin_like                                                 | Zinc Metallopeptidase protein                             |
| 43. | Hma2.226508 | 614 | Zn_Mc, Coagulation factor 5/8 C-terminal domain                   | Zinc Metallopeptidase protein                             |
| 44. | Hma2.220231 | 89  | Zn_Mc, astacin_like subfamily or peptidase family M12A            | Zinc Metallopeptidase protein                             |
| 45. | Hma2.207911 | 385 | Peptidase M12A, astacin                                           | Peptidase M12A, astacin protein                           |
| 46. | Hma2.227078 | 560 | THAP domain, ZnMc_astacin_like, Zinc finger, C2CH-type            | Zinc-dependent metalloprotease protein                    |
| 47. | Hma2.223034 | 240 | Zinc-dependent metalloprotease                                    | Zinc-dependent metalloprotease protein                    |
| 48. | Hma2.204845 | 207 | Zinc-dependent metalloprotease                                    | Zinc-dependent metalloprotease protein                    |
| 49. | Hma2.207176 | 181 | Zinc-dependent metalloprotease                                    | Zinc-dependent metalloprotease protein                    |
| 50. | Hma2.224518 | 149 | Zinc-dependent metalloprotease                                    | Zinc-dependent metalloprotease protein                    |
| 51. | Hma2.203444 | 417 | Trypsin-like serine protease                                      | Trypsin-like serine protease                              |
| 52. | Hma2.226598 | 373 | Trypsin-like serine protease                                      | Trypsin-like serine protease                              |
| 53. | Hma2.230838 | 291 | Trypsin-like serine protease domain in C-terminus                 | Trypsin-like serine protease                              |
| 54. | Hma2.220315 | 54  | Trypsin-like serine protease                                      | Trypsin-like serine protease                              |
| 55. | Hma2.220996 | 67  | Glyco_hydro_56, rve, Integrase core                               | Hyaluronoglucosaminidase                                  |

\* exclusive to Cnidaria

#### 4. Novel Proteins (127 proteins)

##### Novel proteins type 1- unique to Hydra nematocyst proteome (68 proteins)

| S.No | Model Name               | Score | Domains | Annotation |
|------|--------------------------|-------|---------|------------|
| 1.   | Hma2.226049              | 510   | --      | sT1NP1     |
| 2.   | Hma2.231441              | 504   | --      | sT1NP2     |
| 3.   | Hma2.212477              | 452   | --      | sT1NP3     |
| 4.   | Hma2.225499              | 348   | --      | sT1NP4     |
| 5.   | Hma2.210821              | 293   | --      | sT1NP5     |
| 6.   | Hma2.227355              | 284   | --/ CRD | sT1NP6     |
| 7.   | Hma2.229956              | 171   | --      | sT1NP7     |
| 8.   | Hma2.214076              | 168   | --      | sT1NP8     |
| 9.   | Hma2.227774              | 168   | --      | sT1NP9     |
| 10.  | Hma2.232927              | 144   | --      | sT1NP10    |
| 11.  | Hma2.223909              | 143   | --      | sT1NP11    |
| 12.  | Hma2.221196              | 140   | --      | sT1NP12    |
| 13.  | Hma2.219142              | 122   | --      | sT1NP13    |
| 14.  | Hma2.220999              | 1049  | --      | sT1NP14    |
| 15.  | Hma2.216332              | 84    | --      | sT1NP15    |
| 16.  | Hma2.215653              | 72    | --      | sT1NP16    |
| 17.  | Hma2.207672              | 70    | --      | sT1NP17    |
| 18.  | Hma2.232289              | 68    | --      | sT1NP18    |
| 19.  | Hma2.213764              | 321   | --      | T1NP1      |
| 20.  | Hma2.206547              | 106   | --/ TM  | T1NP3      |
| 21.  | Hma2.230385              | 72    | --      | T1NP4      |
| 22.  | Hma2.228816              | 57    | --      | T1NP5      |
| 23.  | Hma2.203447              | 572   | --      | T1NP6      |
| 24.  | Hma2.232573              | 69    | --      | T1NP7      |
| 25.  | Hma2.205707              | 926   | --      | sT1NP19    |
| 26.  | Hma2.205574              | 711   | --      | sT1NP20    |
| 27.  | Hma2.220123 <sup>3</sup> | 618   | --      | sT1NP21    |

|     |                          |      |                                                                                            |                                     |
|-----|--------------------------|------|--------------------------------------------------------------------------------------------|-------------------------------------|
| 28. | Hma2.211580 <sup>1</sup> | 615  | --                                                                                         | sT1NP22                             |
| 29. | Hma2.223666              | 577  | --                                                                                         | sT1NP23                             |
| 30. | Hma2.223834              | 539  | --                                                                                         | sT1NP24                             |
| 31. | Hma2.230174              | 403  | --                                                                                         | sT1NP25                             |
| 32. | Hma2.223672 <sup>3</sup> | 274  | --                                                                                         | sT1NP26                             |
| 33. | Hma2.223671 <sup>2</sup> | 138  | --                                                                                         | sT1NP27                             |
| 34. | Hma2.218494              | 70   | PAN/APPLE-like domain                                                                      | sT1NP28                             |
| 35. | Hma2.221622              | 54   | --                                                                                         | sT1NP29 / zebra precursor protein   |
| 36. | Hma2.215360              | 712  | --                                                                                         | sT1NP30                             |
| 37. | Hma2.209014 <sup>2</sup> | 414  | --                                                                                         | sT1NP31                             |
| 38. | Hma2.209013 <sup>3</sup> | 353  | --                                                                                         | sT1NP32                             |
| 39. | Hma2.204313              | 116  | --                                                                                         | sT1NP33                             |
| 40. | Hma2.203001              | 54   | --                                                                                         | sT1NP34                             |
| 41. | Hma2.231442              | 1830 | SR, Scavenger receptor Cys-rich                                                            | SR repeat protein/ T1NP8            |
| 42. | Hma2.227833              | 1534 | --                                                                                         | T1NP9                               |
| 43. | Hma2.223937              | 795  | Peptidase, cysteine peptidase active site                                                  | Putative cysteine peptidase/ T1NP10 |
| 44. | Hma2.211326              | 704  | HTH_MARR, helix_turn_helix, Homeodomain-like, Transposase_5, Alpha-L-arabinofuranosidase B | T1NP11                              |
| 45. | Hma2.227744              | 413  | helix-turn-helix, Psq domain                                                               | T1NP12                              |
| 46. | Hma2.220917              | 344  | --                                                                                         | T1NP13                              |
| 47. | Hma2.209012 <sup>2</sup> | 311  | --                                                                                         | T1NP14                              |
| 48. | Hma2.214835              | 275  | --                                                                                         | T1NP15                              |
| 49. | Hma2.223748              | 254  | --                                                                                         | T1NP16                              |
| 50. | Hma2.215993              | 245  | --                                                                                         | T1NP17                              |
| 51. | Hma2.211497              | 143  | Phosphopantetheine                                                                         | T1NP18                              |
| 52. | Hma2.224451              | 88   | --                                                                                         | T1NP19                              |
| 53. | Hma2.226783              | 71   | --                                                                                         | T1NP20                              |
| 54. | Hma2.228629              | 592  | --                                                                                         | T1NP21                              |
| 55. | Hma2.210625              | 245  | --                                                                                         | sT1NP35                             |
| 56. | Hma2.219240              | 224  | --                                                                                         | sT1NP36                             |
| 57. | Hma2.202745              | 289  | Concanavalin A-like lectin/glucanase                                                       | sT1NP37                             |
| 58. | Hma2.231389              | 130  | --                                                                                         | sT1NP38                             |
| 59. | Hma2.202690              | 169  | --                                                                                         | sT1NP39                             |
| 60. | Hma2.205947              | 359  | --                                                                                         | T1NP22                              |
| 61. | Hma2.210626              | 274  | --                                                                                         | T1NP23                              |
| 62. | Hma2.201446              | 226  | --                                                                                         | T1NP24                              |
| 63. | Hma2.207867              | 194  | --                                                                                         | T1NP25                              |
| 64. | Hma2.212164              | 77   | --                                                                                         | T1NP26                              |
| 65. | Hma2.204835              | 56   | --                                                                                         | T1NP27                              |
| 66. | Hma2.202946              | 66   | --                                                                                         | T1NP28                              |
| 67. | Hma2.209593              | 294  | APPLE_Factor_XI-like                                                                       | sT1NP40                             |
| 68. | Hma2.209218              | 330  | --                                                                                         | sT1NP41                             |

<sup>1</sup>corresponds to XP\_002159367; <sup>2</sup>corresponds to XP\_002158350; <sup>3</sup>corresponds to XP\_002158350; <sup>3</sup>corresponds to XP\_02167429; <sup>3</sup>corresponds to XP\_02167429

### Novel proteins type 2 – exclusive to Hydra (12 proteins)

| S.No | Model Name  | Score | Domains | Annotation |
|------|-------------|-------|---------|------------|
| 1.   | Hma2.228627 | 1105  | --      | sT2NP1     |
| 2.   | Hma2.204760 | 540   | --      | sT2NP2     |
| 3.   | Hma2.210167 | 536   | --      | sT2NP3     |
| 4.   | Hma2.205649 | 534   | --      | sT2NP4     |
| 5.   | Hma2.208161 | 382   | --      | sT2NP5     |
| 6.   | Hma2.204869 | 333   | --      | sT2NP6     |
| 7.   | Hma2.211599 | 247   | --      | sT2NP7     |
| 8.   | Hma2.215906 | 62    | --      | sT2NP8     |
| 9.   | Hma2.211238 | 1339  | --      | T2NP1      |
| 10.  | Hma2.230175 | 637   | --      | T2NP2      |
| 11.  | Hma2.228631 | 377   | --      | T2NP3      |
| 12.  | Hma2.211236 | 287   | --      | T2NP4      |

## Novel proteins type 3 – exclusive to Cnidaria (Nematostella and Hydra) (17 proteins)

| S.No | Model Name  | Score | Domains                                       | Annotation             |
|------|-------------|-------|-----------------------------------------------|------------------------|
| 1.   | Hma2.203460 | 658   | --                                            | sT3NP1                 |
| 2.   | Hma2.218440 | 220   | --/CRD                                        | sT3NP2                 |
| 3.   | Hma2.228785 | 208   | --                                            | sT3NP3                 |
| 4.   | Hma2.231436 | 188   | Filamin superfamily                           | sT3NP4                 |
| 5.   | Hma2.222128 | 105   | Whey acidic protein, 4-disulphide core        | sT3NP5                 |
| 6.   | Hma2.216085 | 84    | --                                            | sT3NP6                 |
| 7.   | Hma2.230177 | 236   | Sipho_Gp157, PRK03918, chromosome segregation | sT3NP7                 |
| 8.   | Hma2.214508 | 75    | DSL superfamily, WSC superfamily              | sT3NP8                 |
| 9.   | Hma2.202345 | 305   | --                                            | T3NP1                  |
| 10.  | Hma2.215640 | 291   | --                                            | T3NP2                  |
| 11.  | Hma2.223833 | 58    | --                                            | sT3NP9                 |
| 12.  | Hma2.230176 | 523   | --                                            | T3NP3                  |
| 13.  | Hma2.215639 | 266   | DUF885                                        | sT3NP10                |
| 14.  | Hma2.221044 | 157   | --                                            | sT3NP11                |
| 15.  | Hma2.212171 | 267   | DUF885                                        | T3NP4                  |
| 16.  | Hma2.205348 | 236   | Thioredoxin-like fold                         | T3NP5                  |
| 17.  | Hma2.232177 | 60    | --                                            | SN rich Protein/ T3NP6 |

## Novel proteins type 4 - not exclusive to Cnidaria (30 proteins)

| S.No | Model Name  | Score | Domains  | Annotation |
|------|-------------|-------|----------|------------|
| 1.   | Hma2.202738 | 660   | --       | sT4NP1     |
| 2.   | Hma2.232290 | 473   | --       | sT4NP2     |
| 3.   | Hma2.223665 | 447   | --       | sT4NP3     |
| 4.   | Hma2.202895 | 330   | --       | sT4NP4     |
| 5.   | Hma2.208728 | 2059  | --       | sT4NP5     |
| 6.   | Hma2.219109 | 267   | --       | sT4NP6     |
| 7.   | Hma2.207809 | 187   | --       | sT4NP7     |
| 8.   | Hma2.224724 | 145   | --       | sT4NP8     |
| 9.   | Hma2.225171 | 80    | --       | sT4NP9     |
| 10.  | Hma2.212242 | 1607  | --       | sT4NP10    |
| 11.  | Hma2.213404 | 59    | --       | sT4NP11    |
| 12.  | Hma2.210849 | 392   | --       | sT4NP12    |
| 13.  | Hma2.213766 | 89    | --       | sT4NP13    |
| 14.  | Hma2.206574 | 121   | --       | sT4NP14    |
| 15.  | Hma2.230828 | 86    | --       | sT4NP15    |
| 16.  | Hma2.223777 | 395   | --       | sT4NP16    |
| 17.  | Hma2.213742 | 173   | --       | sT4NP17    |
| 18.  | Hma2.214446 | 293   | --       | sT4NP18    |
| 19.  | Hma2.206027 | 231   | --       | sT4NP19    |
| 20.  | Hma2.217458 | 193   | --       | sT4NP20    |
| 21.  | Hma2.213762 | 337   | --       | sT4NP21    |
| 22.  | Hma2.228106 | 1203  | --       | T4NP1      |
| 23.  | Hma2.228626 | 445   | TonB box | T4NP2      |
| 24.  | Hma2.226781 | 349   | --/ TM   | T4NP3      |
| 25.  | Hma2.212240 | 150   | --       | T4NP4      |
| 26.  | Hma2.213314 | 113   | --       | T4NP5      |
| 27.  | Hma2.219945 | 107   | --       | T4NP6      |
| 28.  | Hma2.207946 | 58    | --       | T4NP7      |
| 29.  | Hma2.212170 | 119   | DUF885   | T4NP8      |
| 30.  | Hma2.228805 | 197   | --       | T4NP9      |

## 5. Peptidases (35 proteins)

## Metallopeptidases (27 proteins)

| S.No | Model Name  | Score | Domains                                                                            | Annotation                                               |
|------|-------------|-------|------------------------------------------------------------------------------------|----------------------------------------------------------|
| 1.   | Hma2.228823 | 1341  | Peptidase_M13_N <sup>(2)</sup>                                                     | Peptidase_M13 protein                                    |
| 2.   | Hma2.229432 | 1148  | Peptidase_M13_N <sup>(2)</sup>                                                     | Peptidase_M13 protein                                    |
| 3.   | Hma2.231450 | 585   | Peptidase_M1                                                                       | Peptidase_M1 protein                                     |
| 4.   | Hma2.230132 | 569   | Peptidase_M13 <sup>(2)</sup>                                                       | Peptidase_M13 protein                                    |
| 5.   | Hma2.233930 | 631   | Peptidase M2 Angiotensin converting enzyme                                         | Peptidase M2 protein                                     |
| 6.   | Hma2.206419 | 545   | Peptidase_M14, Zinc carboxypeptidase, CAP-Gly domain                               | Peptidase_M14 protein                                    |
| 7.   | Hma2.215984 | 534   | Peptidase M14, carboxypeptidase A                                                  | Peptidase M14 protein                                    |
| 8.   | Hma2.230133 | 484   | Peptidase_M13_N                                                                    | Peptidase_M13_N protein (endothelin-converting enzyme 1) |
| 9.   | Hma2.224700 | 329   | Peptidase_M13                                                                      | Peptidase_M13 protein                                    |
| 10.  | Hma2.214264 | 245   | Peptidase_M1                                                                       | Peptidase_M1 protein                                     |
| 11.  | Hma2.220602 | 213   | Peptidase_M14 <sup>(3)</sup> , RVT_1, murein peptide amidase A                     | Peptidase M14 protein                                    |
| 12.  | Hma2.230129 | 205   | Peptidase family M13                                                               | Peptidase M13 protein                                    |
| 13.  | Hma2.232373 | 136   | Peptidase_M28                                                                      | Peptidase_M28                                            |
| 14.  | Hma2.225164 | 65    | Peptidase_M14, Zinc carboxypeptidase                                               | Peptidase_M14 protein                                    |
| 15.  | Hma2.217050 | 145   | ZnMc_ADAMTS-like, TSP1                                                             | Zinc Metallopeptidase protein                            |
| 16.  | Hma2.230134 | 146   | Peptidase M13, neprilysin                                                          | Peptidase M13, neprilysin domain protein                 |
| 17.  | Hma2.217049 | 119   | ZnMc_ADAMTS-like/ Reprolysin                                                       | Zinc-dependent metalloprotease protein_ ADAMTS-like      |
| 18.  | Hma2.230128 | 76    | Peptidase_M13_N                                                                    | Peptidase M13, neprilysin domain protein                 |
| 19.  | Hma2.207177 | 66    | Peptidase M12A, astacin                                                            | Peptidase M12A, astacin protein                          |
| 20.  | Hma2.217613 | 84    | MAM (15), Trefoil (P-type) <sup>(2)</sup>                                          | Meprin, A5 protein                                       |
| 21.  | Hma2.217281 | 58    | ZnMc_MMP, PG_binding_1                                                             | Zinc Metallopeptidase protein                            |
| 22.  | Hma2.231451 | 1338  | Peptidase_M1 (2)                                                                   | Peptidase M1 domain protein                              |
| 23.  | Hma2.224191 | 290   | Peptidase family M2 Angiotensin converting enzyme                                  | Peptidase family M2 Angiotensin converting enzyme        |
| 24.  | Hma2.212166 | 76    | ZnMc_BMP1_TLD                                                                      | Peptidase M12A, astacin protein                          |
| 25.  | Hma2.230127 | 434   | Peptidase family M13                                                               | Peptidase M13 domain protein                             |
| 26.  | Hma2.217051 | 255   | TSP_1(1), CUB (2), Whey acidic protein, 4-disulphide core, Peptidase M12B, ADAM-TS | Similar to ADAM metallopeptidase with TSP1, CUB domains  |
| 27.  | Hma2.226148 | 175   | Peptidase_M14, Zinc carboxypeptidase                                               | Peptidase_M14, Zinc carboxypeptidase                     |

## Serine peptidases (5 proteins)

| S.No | Model Name  | Score | Domains                                                                                  | Annotation                                    |
|------|-------------|-------|------------------------------------------------------------------------------------------|-----------------------------------------------|
| 1.   | Hma2.230756 | 825   | Peptidase_S8, P protein                                                                  | Peptidase S8 protein (Kex2-like endoprotease) |
| 2.   | Hma2.206020 | 333   | Peptidase_S8, Subtilase family and PA domain                                             | Peptidase S8 protein                          |
| 3.   | Hma2.221006 | 360   | Peptidase_S8 <sup>(2)</sup> , P_protein                                                  | Peptidase S8 protein                          |
| 4.   | Hma2.228725 | 87    | Serine carboxypeptidase S28                                                              | Peptidase S28 protein                         |
| 5.   | Hma2.230757 | 493   | P proprotein, Peptidase S8 and S53, subtilisin, kexin, sedolisin, Galactose-binding-like | Kex2-like endoprotease                        |

## Cysteine peptidases (3 proteins)

| S.No | Model Name  | Score | Domains                                                             | Annotation            |
|------|-------------|-------|---------------------------------------------------------------------|-----------------------|
| 1.   | Hma2.231800 | 311   | Peptidase C1A subfamily                                             | Peptidase C1A protein |
| 2.   | Hma2.214055 | 95    | Peptidase_C1A, Inhibitor_I29, Cathepsin propeptide inhibitor domain | Peptidase C1A protein |
| 3.   | Hma2.224909 | 125   | Peptidase_C1A, Inhibitor_I29, Rota_VP2                              | Peptidase C1A protein |

## 6. Metabolic Enzymes (32 Proteins)

## Carbonic Anhydrases (9 proteins)

| S.No | Model Name  | Score | Domains                                  | Annotation                       |
|------|-------------|-------|------------------------------------------|----------------------------------|
| 1.   | Hma2.205404 | 958   | Alpha_CA                                 | Alpha Carbonic Anhydrase protein |
| 2.   | Hma2.230311 | 603   | Alpha CA                                 | Alpha Carbonic Anhydrase protein |
| 3.   | Hma2.208819 | 257   | Alpha_CA, hAT family dimerisation domain | Alpha Carbonic Anhydrase protein |
| 4.   | Hma2.221613 | 238   | Alpha_CA_prokaryotic-like                | Alpha Carbonic Anhydrase protein |
| 5.   | Hma2.226119 | 104   | Alpha_CA, ZnF_TTF                        | Alpha Carbonic Anhydrase protein |
| 6.   | Hma2.201739 | 933   | alpha_Carbonic anhydrase                 | Carbonic anhydrase VII           |
| 7.   | Hma2.200790 | 292   | Carbonic anhydrase, eukaryotic           | Alpha Carbonic anhydrase protein |
| 8.   | Hma2.213538 | 235   | Carbonic anhydrase, eukaryotic           | Alpha Carbonic anhydrase protein |
| 9.   | Hma2.205318 | 144   | alpha_Carbonic anhydrase                 | Alpha Carbonic anhydrase protein |

## Glutamate Metabolism (9 proteins)

| S.No | Model Name                           | Score              | Domains                                     | Annotation                                 |
|------|--------------------------------------|--------------------|---------------------------------------------|--------------------------------------------|
| 1.   | Hma2.231813                          | 494                | Glutamine amidotransferase (GATase1) domain | Folyl-polygamma-glutamyl hydrolase         |
| 2.   | Hma2.231816                          | 297                | Glutamine amidotransferase (GATase1) domain | Glutamine amidotransferase                 |
| 3.   | Hma2.211598                          | 352                | Glutamine amidotransferase (GATase1) domain | Glutamine amidotransferase                 |
| 4.   | Hma2.228945                          | 1136               | Gamma-glutamyltranspeptidase                | Gamma-glutamyltranspeptidase               |
| 5.   | Hma2.222066                          | 401                | Gamma-glutamyltranspeptidase                | Gamma-glutamyltranspeptidase               |
| 6.   | <a href="#">AY372112<sup>†</sup></a> | <a href="#">91</a> | Protein phosphatase 2A                      | poly-gamma-glutamate synthesis protein     |
| 7.   | Hma2.218845                          | 191                | Peptidase_M28, TFR_dimer                    | Folylpoly-gamma-glutamate carboxypeptidase |
| 8.   | Hma2.221597                          | 53                 | GATase1-like domain/ Peptidase C26          | Peptidase C26, gamma-glutamyl hydrolase    |
| 9.   | Hma2.224040                          | 317                | Protein phosphatase 2A                      | Cap A2 protein                             |

<sup>†</sup>2D Gel Data

## Glycoside hydrolases (5 proteins)

| S.No | Model Name  | Score | Domains                                                                            | Annotation                                |
|------|-------------|-------|------------------------------------------------------------------------------------|-------------------------------------------|
| 1.   | Hma2.222377 | 836   | Glyco_hydro_20 <sup>(2)</sup>                                                      | Glycoside Hydrolase 20                    |
| 2.   | Hma2.212228 | 107   | GH18_chitolectin_chitotriosidase, Glycoside hydrolase, family 18, catalytic domain | Chitinase 1 precursor                     |
| 3.   | Hma2.222634 | 290   | Glycoside hydrolase, family 20, beta-N-acetylhexosaminidase-like                   | Beta-N-acetyl hexosaminidase-like protein |
| 4.   | Hma2.219971 | 275   | Glycoside hydrolase                                                                | Glycoside hydrolase protein               |
| 5.   | Hma2.208934 | 231   | Glyco_hydro_2_C, Glyco_hydro_2_N, Galactose-binding-like                           | Glucuronidase, beta                       |



## Protease-associated Glycosidase (1 protein)

| S.No | Model Name  | Score | Domains                                                  | Annotation                                |
|------|-------------|-------|----------------------------------------------------------|-------------------------------------------|
| 1.   | Hma2.219796 | 565   | Protease-associated (PA) domain, Peptide-N-glycosidase F | PA domain Peptide-N-glycosidase F protein |

## Other Carbohydrate-modifying Enzymes (8 proteins)

| S.No | Model Name        | Score | Domains                                                   | Annotation                              |
|------|-------------------|-------|-----------------------------------------------------------|-----------------------------------------|
| 1.   | Hma2.216082       | 907   | Alpha_L_fucos,Alpha-L-fucosidase                          | Alpha-L-fucosidase                      |
| 2.   | Hma2.222989       | 806   | Predicted bile acid beta-glucosidase, MAP7, tolA          | Bile acid glucosidase domain protein    |
| 3.   | Hma2.222992       | 526   | DUF608, Six-hairpin, glycosidase-like                     | DUF608, Six-hairpin, glycosidase-like   |
| 4.   | Hma2.221275       | 128   | Alpha-L-arabinofuranosidase B                             | Alpha-L-arabinofuranosidase B protein   |
| 5.   | Hma2.225146       | 75    | AbfB, Alpha-L-arabinofuranosidase B (ABFB) <sup>(3)</sup> | Alpha-L-arabinofuranosidase B           |
| 6.   | Hma2.217297       | 71    | Alpha-L-arabinofuranosidase B (ABFB)                      | Alpha-L-arabinofuranosidase B (ABFB)    |
| 7.   | Contig38567.g4.t1 | 3159  | Alpha-L-arabinofuranosidase B                             | Alpha-L-arabinofuranosidase B protein   |
| 8.   | Hma2.221421       | 79    | FBP_aldolase_I_a, Fructose-1,6-bisphosphate aldolase      | Fructose-bisphosphate aldolase, class-I |

## 7. Other Enzymes (31 proteins)

## Lipase/ Esterases (6 proteins)

| S.No | Model Name  | Score | Domains                       | Annotation                     |
|------|-------------|-------|-------------------------------|--------------------------------|
| 1.   | Hma2.209632 | 299   | SGNH_hydrolase                | SGNH-hydrolase protein         |
| 2.   | Hma2.222278 | 106   | SGNH_hydrolase                | SGNH-hydrolase protein         |
| 3.   | Hma2.216338 | 72    | SGNH_hydrolase                | SGNH-hydrolase protein         |
| 4.   | Hma2.210990 | 447   | Esterase, SGNH hydrolase-type | SGNH hydrolase-type protein    |
| 5.   | Hma2.228466 | 225   | SGNH_hydrolase                | SGNH hydrolase-type protein    |
| 6.   | Hma2.211616 | 166   | Lipase_3                      | Lipase, class 3 domain protein |

## Peptidyl-prolyl cis-trans isomerase (6 proteins)

| S.No | Model Name  | Score | Domains                                                | Annotation                                           |
|------|-------------|-------|--------------------------------------------------------|------------------------------------------------------|
| 1.   | Hma2.217142 | 714   | cyclophilin_ABH-like                                   | Peptidyl-prolyl cis-trans isomerase protein          |
| 2.   | Hma2.225963 | 112   | FKBP_C, FKBP-type peptizing-prolyl cis-trans isomerase | Peptidyl-prolyl cis-trans isomerase protein          |
| 3.   | Hma2.211972 | 65    | FKBP-type peptidyl-prolyl cis-trans isomerase          | Peptidyl-prolyl cis-trans isomerase protein          |
| 4.   | Hma2.205048 | 120   | cyclophilin_ABH-like                                   | cyclophilin_ABH-like protein                         |
| 5.   | Hma2.229629 | 69    | cyclophilin-type peptidylprolyl cis- trans isomerase   | cyclophilin-type peptidylprolyl cis- trans isomerase |
| 6.   | Hma2.211965 | 59    | Peptidyl-prolyl cis-trans isomerase, cyclophilin-type  | cyclophilin-type peptidylprolyl cis- trans isomerase |

## Protein Disulfide Isomerase (2 proteins)

| S.No | Model Name  | Score | Domains                                   | Annotation                          |
|------|-------------|-------|-------------------------------------------|-------------------------------------|
| 1.   | Hma2.217925 | 136   | Protein Disulfide Isomerase (PDIa)        | Protein Disulfide Isomerase protein |
| 2.   | Hma2.220701 | 113   | Protein Disulfide Isomerase (Thioredoxin) | Protein Disulfide Isomerase protein |

## ADP-ribosyl hydrolase (3 proteins)

| S.No | Model Name  | Score | Domains                            | Annotation                  |
|------|-------------|-------|------------------------------------|-----------------------------|
| 1.   | Hma2.225914 | 668   | Rib_hydrolase, ADP-ribosyl cyclase | ADP-ribosyl cyclase protein |
| 2.   | Hma2.225918 | 198   | Rib_hydrolase, ADP-ribosyl cyclase | ADP-ribosyl cyclase protein |
| 3.   | Hma2.225912 | 483   | Rib_hydrolase, NAD(P)-binding      | ADP-ribosyl cyclase protein |

## ATPase (2 proteins)

| S.No | Model Name  | Score | Domains                                       | Annotation                                   |
|------|-------------|-------|-----------------------------------------------|----------------------------------------------|
| 1.   | Hma2.203093 | 356   | F1-ATPase_beta                                | F1-ATPase_beta protein                       |
| 2.   | Hma2.209899 | 86    | ATP-synt_S1, Vacuolar ATP synthase subunit S1 | Vacuolar ATP synthase subunit S1 protein/ TM |

## Rib hydrolase (1 protein)

| S.No | Model Name  | Score | Domains                            | Annotation                  |
|------|-------------|-------|------------------------------------|-----------------------------|
| 1.   | Hma2.225917 | 106   | Rib_hydrolase, ADP-ribosyl cyclase | ADP-ribosyl cyclase protein |

## Phosphodiesterase / nucleotide pyrophosphatase (3 proteins)

| S.No | Model Name  | Score | Domains                                               | Annotation                               |
|------|-------------|-------|-------------------------------------------------------|------------------------------------------|
| 1.   | Hma2.217104 | 429   | Type I phosphodiesterase / nucleotide pyrophosphatase | Phosphodiesterase protein                |
| 2.   | Hma2.230617 | 133   | Type I phosphodiesterase / nucleotide pyrophosphatase | Phosphodiesterase protein                |
| 3.   | Hma2.216423 | 58    | 3'5'-cyclic nucleotide phosphodiesterase              | 3'5'-cyclic nucleotide phosphodiesterase |

## Ungrouped Enzymes (8 proteins)

| S.No | Model Name  | Score | Domains                                     | Annotation                                  |
|------|-------------|-------|---------------------------------------------|---------------------------------------------|
| 1.   | Hma2.210882 | 537   | Sulfatase                                   | Arylsulfatase A                             |
| 2.   | Hma2.231407 | 117   | RNase_T2_euk, Ribonuclease T2               | Rnase_T2 protein                            |
| 3.   | Hma2.214071 | 73    | Acid_phosphat_A, Histidine acid phosphatase | Acid_phosphat_A, Histidine acid phosphatase |
| 4.   | Hma2.206651 | 642   | RelA / SpoT protein (GTP pyrophosphokinase) | RelA / SpoT protein                         |
| 5.   | Hma2.200322 | 57    | Electrontransport oxidoreductase            | acyl-Coenzyme A dehydrogenase               |
| 6.   | Hma2.209499 | 54    | RT_nLTR-like                                | Reverse Transcriptase                       |
| 7.   | Hma2.210478 | 540   | Sulfatase                                   | Arylsulfatase B related                     |
| 8.   | Hma2.223427 | 207   | F1_ATPase_alpha                             | F1 ATPase protein                           |

## 8. Ungrouped Proteins (16 proteins)

| S.No | Model Name  | Score | Domains                                                             | Annotation                                               |
|------|-------------|-------|---------------------------------------------------------------------|----------------------------------------------------------|
| 1.   | Hma2.220294 | 81    | Ribophorin_II                                                       | Ribophorin_II protein                                    |
| 2.   | Hma2.208678 | 363   | General transcription factor 2 related Zn finger protein            | General Transcription factor 2 related Zn finger protein |
| 3.   | Hma2.217685 | 224   | GM2 activator protein (GM2-AP)                                      | GM2 activator protein (GM2-AP) protein                   |
| 4.   | Hma2.207472 | 132   | SOUL heme-binding protein                                           | SOUL heme-binding protein                                |
| 5.   | Hma2.209240 | 91    | Translocon-associated protein, delta subunit precursor (TRAP-delta) | Translocon-associated protein 1                          |
| 6.   | Hma2.234288 | 54    | TRAP_beta                                                           | TRAP_beta domain protein                                 |
| 7.   | Hma2.212036 | 95    | GM2-AP                                                              | GM2 activator protein                                    |
| 8.   | Hma2.215378 | 111   | GST_N_Metaxin-like/ Thioredoxin-like fold                           | GST_N_Metaxin-like protein                               |
| 9.   | Hma2.227465 | 181   | 14-3-3 protein                                                      | 14-3-3 protein                                           |
| 10.  | Hma2.223439 | 401   | Eukaryotic porin                                                    | Voltage-dependent anion channel 2 related                |
| 11.  | Hma2.215915 | 51    | Phosphatidylinositol transfer protein                               | Phosphatidylinositol transfer protein                    |
| 12.  | Hma2.224077 | 54    | Zinc finger, SWIM-type                                              | Zinc finger, SWIM-type protein                           |
| 13.  | Hma2.232227 | 171   | Mito_carr /TM                                                       | Solute carrier family 25 protein                         |
| 14.  | Hma2.228538 | 166   | Mito_carr(3)                                                        | ADP/ATP-translocator protein                             |
| 15.  | Hma2.205823 | 57    | General TF related Zn finger                                        | General TF related Zn finger                             |
| 16.  | Hma2.221884 | 54    | MADS_MEF2-like (Mef2 myocyte enhancer factor 2)                     | Mef2 myocyte enhancer factor 2-like protein              |

## 9. Contaminants (25 proteins)

## Cellular housekeeping enzymes (4 proteins)

| S.No | Model Name  | Score | Domains                                          | Annotation                                      |
|------|-------------|-------|--------------------------------------------------|-------------------------------------------------|
| 1.   | Hma2.226194 | 59    | Hsp90 protein, Histidine kinase-like ATPases     | Heat shock protein 90 alpha                     |
| 2.   | Hma2.228992 | 59    | Heat shock protein Hsp90                         | TNF receptor-associated protein 1 related       |
| 3.   | Hma2.228164 | 68    | MDH_cytoplasmic_cytosolic, malate dehydrogenases | MDH_cytoplasmic_cytosolic, malate dehydrogenase |
| 4.   | Hma2.225097 | 87    | Glyceraldehyde 3-phosphate dehydrogenase         | Glyceraldehyde 3-phosphate dehydrogenase        |

## Cytoskeleton &amp; Associated proteins (4 proteins)

| S.No | Model Name  | Score | Domains                                                 | Annotation                                      |
|------|-------------|-------|---------------------------------------------------------|-------------------------------------------------|
| 1.   | Hma2.208898 | 454   | Actin/actin-like                                        | Actin                                           |
| 2.   | Hma2.209092 | 220   | Beta_tubulin                                            | Beta tubulin                                    |
| 3.   | Hma2.214514 | 115   | ADF, Actin depolymerisation factor/cofilin-like domains | Actin-binding, cofilin/tropomyosin type protein |
| 4.   | Hma2.201478 | 68    | Profilin                                                | Profilin                                        |

## Histones/ Nuclear proteins (5 proteins)

| S.No | Model Name  | Score | Domains     | Annotation                            |
|------|-------------|-------|-------------|---------------------------------------|
| 1.   | Hma2.207221 | 211   | Histone H2A | Histone H2A                           |
| 2.   | Hma2.232238 | 207   | Histone H2B | Histone H2B                           |
| 3.   | Hma2.202246 | 147   | Histone H4  | Histone H4                            |
| 4.   | Hma2.223504 | 133   | Histone H2B | Histone H2B                           |
| 5.   | Hma2.219010 | 51    | --          | GK Rich Protein/nucleoprotein related |

## Ribosomal Proteins (6 proteins)

| S.No | Model Name  | Score | Domains                                                   | Annotation                                  |
|------|-------------|-------|-----------------------------------------------------------|---------------------------------------------|
| 1.   | Hma2.230573 | 109   | Ribosomal protein L11                                     | Ribosomal protein L11                       |
| 2.   | Hma2.233208 | 94    | Ribosomal protein P2                                      | Ribosomal protein 60S                       |
| 3.   | Hma2.223409 | 85    | Ribosomal_L7_archaeal_euk                                 | Ribosomal protein L7, eukaryotic            |
| 4.   | Hma2.204685 | 82    | 40S_S3_KH, K homology RNA-binding (KH),<br>Ribosomal_S3_C | Ribosomal protein S3 with K homology domain |
| 5.   | Hma2.202566 | 52    | Ribosomal_S4e, RS4NT                                      | Ribosomal protein S4                        |
| 6.   | Hma2.204686 | 51    | Ribosomal protein L1                                      | 60S ribosomal protein L10A                  |

## Transposases (2 proteins)

| S.No | Model Name  | Score | Domains             | Annotation                               |
|------|-------------|-------|---------------------|------------------------------------------|
| 1.   | Hma2.222240 | 77    | Mariner transposase | Mariner transposase                      |
| 2.   | Hma2.221596 | 69    | --                  | Similar to transposase [Oryzias latipes] |

## RNA-directed DNA polymerase (4 proteins)

| S.No | Model Name  | Score | Domains      | Annotation                          |
|------|-------------|-------|--------------|-------------------------------------|
| 1.   | Hma2.213895 | 384   | RT_nLTR-like | RNA-directed DNA polymerase protein |
| 2.   | Hma2.211237 | 167   | RT_nLTR-like | RNA-directed DNA polymerase protein |
| 3.   | Hma2.217759 | 152   | RT_nLTR-like | RNA-directed DNA polymerase protein |
| 4.   | Hma2.215134 | 55    | --           | RT related protein                  |

Supplementary Table 2. Nematocyst shell proteome of *Hydra magnipapillata*.1. Structural Proteins (36 proteins)

## Minicollagens and Proline-rich proteins (21 proteins)

| S.No | Model Name  | Score | Domains                                 | Annotation      |
|------|-------------|-------|-----------------------------------------|-----------------|
| 1.   | Hma2.216559 | 54    | Poly proline stretch, CRD               | CPP-1           |
| 2.   | Hm-Ncol-1   | 443   | GXY repeat, Proline rich, CRD           | Minicollagen-1  |
| 3.   | Hm-Ncol-2   | 311   | GXY repeat, Proline rich, CRD           | Minicollagen-2  |
| 4.   | Hm-Ncol-3   | 404   | GXY repeat, Proline rich                | Minicollagen-3  |
| 5.   | Hm-Ncol-4   | 531   | GXY repeat, Proline rich                | Minicollagen-4  |
| 6.   | Hm-Ncol-5   | 1170  | GXY repeat, Proline rich, CRD           | Minicollagen-5  |
| 7.   | Hm-Ncol-6   | 1232  | GXY repeat, Proline rich, CRD           | Minicollagen-6  |
| 8.   | Hm-Ncol-7   | 129   | GXY repeat, Proline rich, CRD           | Minicollagen-7  |
| 9.   | Hm-Ncol-8   | 359   | GXY repeat, Proline rich                | Minicollagen-8  |
| 10.  | Hm-Ncol-9   | 139   | GXY repeat, Proline rich                | Minicollagen-9  |
| 11.  | Hm-Ncol-10  | 305   | GXY repeat, Proline rich, CRD           | Minicollagen-10 |
| 12.  | Hm-Ncol-12  | 224   | GXY repeat, Proline rich, CRD           | Minicollagen-12 |
| 13.  | Hm-Ncol-13  | 417   | GXY repeat, Proline rich                | Minicollagen-13 |
| 14.  | Hm-Ncol-14  | 91    | GXY repeat, Proline rich                | Minicollagen-14 |
| 15.  | Hm-Ncol-15  | 299   | GXY repeat, Proline rich, CRD           | Minicollagen-15 |
| 16.  | Hm-Ncol-16  | 71    | GXY repeat, Proline rich, CRD           | Minicollagen-16 |
| 17.  | Hm-Ncol-17  | 110   | GXY repeat, Proline rich, CRD           | Minicollagen-17 |
| 18.  | Hma2.225439 | 220   | Gal-lectin/ SUEL lectin with GXY repeat | Collectin       |
| 19.  | Hma2.219592 | 106   | GXY repeat                              | Minicollagen-21 |
| 20.  | Hma2.231401 | 202   | GXY repeat, CRD                         | Minicollagen-18 |
| 21.  | Hma2.228331 | 51    | GXY repeat, coiled-coil, CRD            | Minicollagen-20 |

## Other ECM motif proteins (11 proteins)

| S.No | Model Name  | Score | Domains                                                                                                              | Annotation                                              |
|------|-------------|-------|----------------------------------------------------------------------------------------------------------------------|---------------------------------------------------------|
| 1.   | Hma2.227746 | 142   | Fibronectin Type II, collagen-binding, Kringle-like fold                                                             | Fibronectin Type II -kringle-like domain protein        |
| 2.   | Hma2.203577 | 63    | TSP1 <sup>(2)</sup> , Fibronectin type II, collagen-binding, Concanavalin A-like lectin/glucanase, Kringle-like fold | TSP1 Fibronectin domain protein                         |
| 3.   | Hma2.232918 | 256   | Thrombospondin, type 1 repeat                                                                                        | Thrombospondin, type 1 repeat protein / PQ rich protein |
| 4.   | Hma2.213810 | 51    | Gal-lectin/ SUEL lectin, CRD                                                                                         | Gal-lectin/ SUEL lectin                                 |
| 5.   | Hma2.206417 | 32    | C-Lectin                                                                                                             | C-Lectin domain protein                                 |
| 6.   | Hma2.226267 | 373   | SCP_GAPR-1, C-Lectin, SEA, CRD                                                                                       | NOWA                                                    |
| 7.   | Hma2.215621 | 232   | vWFA, SCP_GAPR-1, C-Lectin, CRD                                                                                      | NOWA-like protein                                       |
| 8.   | Hma2.211381 | 74    | SEA domain <sup>(2)</sup> , CRD                                                                                      | SEA domain protein                                      |
| 9.   | Hma2.232437 | 109   | vWFA <sup>(2)</sup> , collagen triple helix <sup>(7)</sup>                                                           | vWFA domain protein with collagen triple helix          |
| 10.  | Hma2.206786 | 92    | Pentraxin / LamGL                                                                                                    | Geeta protein                                           |
| 11.  | Hma2.224520 | 348   | TSP1, Fibrinogen ReD, LamGL                                                                                          | Rajukutty protein                                       |

## Other Structural Proteins (4 proteins)

| S.No | Model Name  | Score | Domains                               | Annotation               |
|------|-------------|-------|---------------------------------------|--------------------------|
| 1.   | Hma2.209281 | 95    | DKK related Cysteine Domain           | DKK-3 family protein     |
| 2.   | Hma2.230887 | 61    | DKK related Cysteine Domain           | DKK-3 family protein     |
| 3.   | Hma2.228381 | 71    | -                                     | Spinalin                 |
| 4.   | Hma2.213243 | 55    | WD40 repeat-like/LRR kinase 2 related | WD40 repeat-like protein |

## 2. Calcium Binders (4 proteins)

| S.No | Model Name  | Score | Domains                                 | Annotation                   |
|------|-------------|-------|-----------------------------------------|------------------------------|
| 1.   | Hma2.228411 | 379   | MACPF, EGF_Ca                           | MACPF domain protein         |
| 2.   | Hma2.213553 | 120   | MACPF, EGF_Ca                           | MACPF domain protein         |
| 3.   | Hma2.212260 | 111   | MACPF, EGF_Ca                           | MACPF, EGF_Ca domain protein |
| 4.   | Hma2.211690 | 70    | EGF-like, type 3/ EGF_Ca <sup>(6)</sup> | EGF-Ca domain protein        |

## 3. Venoms (9 proteins)

| S.No | Model Name   | Score | Domains                                                     | Annotation                     |
|------|--------------|-------|-------------------------------------------------------------|--------------------------------|
| 1.   | Hma2.227742* | 639   | Fibronectin Type 2                                          | FN2 domain protein (toxin)     |
| 2.   | Hma2.210268* | 207   | Toxin precursor Cnidocyst Hemolysis signal-A-sequence, TM   | Toxin precursor                |
| 3.   | Hma2.224206  | 169   | PLA2_bee_venom-like                                         | PLA2_bee_venom-like protein    |
| 4.   | Hma2.226192* | 220   | --                                                          | Toxin-A protein                |
| 5.   | Hma2.221138  | 218   | Toxin precursor cnidocyst hemolysis signal a sequencing/ TM | Toxin precursor protein        |
| 6.   | Hma2.226366  | 89    | SCP <sup>(4)</sup>                                          | Tetra SCP protein              |
| 7.   | Hma2.226368  | 88    | SCP-like extracellular <sup>(2)</sup>                       | SCP-like extracellular protein |
| 8.   | Hma2.207560  | 57    | SCP_GAPR-1-like, Allergen V5/Tpx-1 related                  | SCP_GAPR-1-like protein        |
| 9.   | Hma2.230680  | 99    | WD40, DUF938, Methyltransf_12, Cytosolic fatty-acid binding | WD40 domain protein            |

\* exclusive to Cnidaria

## 4. Novel Proteins (29 proteins)

### Novel proteins type 1 (unique to Nematocyst Proteome) (16 proteins)

| S.No | Model Name  | Score | Domains                                   | Annotation                          |
|------|-------------|-------|-------------------------------------------|-------------------------------------|
| 1.   | Hma2.203447 | 572   | --                                        | T1NP6                               |
| 2.   | Hma2.231442 | 516   | SR, Scavenger receptor Cys-rich           | SR repeat protein/ T1NP8            |
| 3.   | Hma2.227833 | 224   | --                                        | T1NP9                               |
| 4.   | Hma2.223937 | 123   | Peptidase, cysteine peptidase active site | Putative cysteine peptidase/ T1NP10 |
| 5.   | Hma2.231441 | 122   | --                                        | sT1NP2                              |
| 6.   | Hma2.209012 | 113   | --                                        | T1NP14                              |
| 7.   | Hma2.220123 | 95    | --                                        | sT1NP21                             |
| 8.   | Hma2.211580 | 71    | --                                        | sT1NP22                             |
| 9.   | Hma2.209218 | 71    | --                                        | sT1NP41                             |
| 10.  | Hma2.223748 | 69    | --                                        | T1NP16                              |
| 11.  | Hma2.232573 | 69    | --                                        | T1NP7                               |
| 12.  | Hma2.202946 | 66    | --                                        | T1NP28                              |
| 13.  | Hma2.227744 | 60    | helix-turn-helix, Psq domain              | T1NP12                              |
| 14.  | Hma2.215993 | 56    | --                                        | T1NP17                              |
| 15.  | Hma2.212477 | 56    | --                                        | sT1NP3                              |
| 16.  | Hma2.205574 | 50    | --                                        | sT1NP20                             |

## Novel proteins type 2 unique to Hydra (8 proteins)

| S.No | Model Name  | Score | Domains | Annotation |
|------|-------------|-------|---------|------------|
| 1.   | Hma2.208161 | 255   | --      | sT2NP5     |
| 2.   | Hma2.210167 | 237   | --      | sT2NP3     |
| 3.   | Hma2.204760 | 235   | --      | sT2NP2     |
| 4.   | Hma2.230175 | 173   | --      | T2NP2      |
| 5.   | Hma2.205649 | 105   | --      | sT2NP4     |
| 6.   | Hma2.211238 | 73    | --      | T2NP1      |
| 7.   | Hma2.228627 | 56    | --      | sT2NP1     |
| 8.   | Hma2.215995 | 54    | --      | sT2NP9     |

## Novel proteins type 3 (Unique to Hydra and Nematostella) (2 proteins)

| S.No | Model Name  | Score | Domains | Annotation |
|------|-------------|-------|---------|------------|
| 1.   | Hma2.203460 | 116   | -       | sT3NP1     |
| 2.   | Hma2.218440 | 87    | -/CRD   | sT3NP2     |

## Novel proteins type 4 (Not unique to Cnidaria) (3 proteins)

| S.No | Model Name  | Score | Domains | Annotation |
|------|-------------|-------|---------|------------|
| 1.   | Hma2.232290 | 133   | -       | sT4NP2     |
| 2.   | Hma2.212242 | 118   | -       | sT4NP10    |
| 3.   | Hma2.206027 | 56    | -       | sT4NP20    |

## 5. Peptidases (5 proteins)

## Metallopeptidases (5 proteins)

| S.No | Model Name  | Score | Domains                                    | Annotation                  |
|------|-------------|-------|--------------------------------------------|-----------------------------|
| 1.   | Hma2.229432 | 222   | Peptidase_M13_N <sup>(2)</sup>             | Peptidase_M13 protein       |
| 2.   | Hma2.231451 | 187   | Peptidase_M1 <sup>(2)</sup>                | Peptidase M1 domain protein |
| 3.   | Hma2.230132 | 105   | Peptidase_M13 <sup>(2)</sup>               | Peptidase_M13 protein       |
| 4.   | Hma2.228823 | 73    | Peptidase_M13_N <sup>(2)</sup>             | Peptidase_M13 protein       |
| 5.   | Hma2.233930 | 57    | Peptidase M2 Angiotensin converting enzyme | Peptidase M2 protein        |

## 6. Metabolic Enzymes

## Carbonic Anhydrases (4 proteins)

| S.No | Model Name  | Score | Domains                                  | Annotation                       |
|------|-------------|-------|------------------------------------------|----------------------------------|
| 1.   | Hma2.201739 | 234   | alpha_Carbonic anhydrase                 | Carbonic anhydrase VII           |
| 2.   | Hma2.205404 | 226   | Alpha_CA                                 | Alpha Carbonic Anhydrase protein |
| 3.   | Hma2.230311 | 101   | Alpha CA                                 | Alpha Carbonic Anhydrase protein |
| 4.   | Hma2.208819 | 65    | Alpha_CA, hAT family dimerisation domain | Alpha Carbonic Anhydrase protein |

### Glutamate Metabolism (4 proteins)

| S.No | Model Name  | Score | Domains                                     | Annotation                         |
|------|-------------|-------|---------------------------------------------|------------------------------------|
| 1.   | Hma2.211598 | 132   | Glutamine amidotransferase (GATase1) domain | Glutamine amidotransferase         |
| 2.   | Hma2.231813 | 64    | Glutamine amidotransferase (GATase1) domain | Folyl-polygamma-glutamyl hydrolase |
| 3.   | Hma2.228945 | 128   | Gamma Glutamyl Transpeptidase               | Gamma-glutamyltranspeptidase       |
| 4.   | Hma2.222066 | 85    | Gamma Glutamyl Transpeptidase               | Gamma-glutamyltranspeptidase       |

### Glycoside Hydrolases (1 protein)

| S.No | Model Name  | Score | Domains                                                          | Annotation                                |
|------|-------------|-------|------------------------------------------------------------------|-------------------------------------------|
| 1.   | Hma2.222634 | 78    | Glycoside hydrolase, family 20, Beta-N-acetylhexosaminidase-like | Beta-N-acetyl hexosaminidase-like protein |

### 7. Other Enzymes (3 proteins)

| S.No | Model Name  | Score | Domains                            | Annotation                  |
|------|-------------|-------|------------------------------------|-----------------------------|
| 1.   | Hma2.225912 | 73    | Rib_hydrolase,NAD(P)-binding       | ADP-ribosyl cyclase protein |
| 2.   | Hma2.225914 | 51    | Rib_hydrolase, ADP-ribosyl cyclase | ADP-ribosyl cyclase protein |
| 3.   | Hma2.209499 | 54    | RT_nLTR-like                       | Reverse Transcriptase       |

### 8. Ungrouped Proteins (3 protein)

| S.No | Model Name  | Score | Domains                                                    | Annotation                                               |
|------|-------------|-------|------------------------------------------------------------|----------------------------------------------------------|
| 1.   | Hma2.208678 | 94    | General transcription factor 2 related zinc finger protein | General Transcription factor 2 related Zn finger protein |
| 2.   | Hma2.205823 | 57    | General TF related Zn finger                               | General TF related Zn finger                             |
| 3.   | Hma2.221884 | 54    | MADS_MEF2-like (Mef2 myocyte enhancer factor 2)            | Mef2 myocyte enhancer factor 2-like protein              |

## Supplementary Table 3. Shared proteome with HU treated nematocyst-free hydras.

## 1. Structural Proteins (14 proteins)

## ECM motif proteins (5 proteins)

| S.No | Model Name  | Score | Domains                                                                                    | Annotation                                |
|------|-------------|-------|--------------------------------------------------------------------------------------------|-------------------------------------------|
| 1.   | Hma2.208994 | 67    | TSP1 /vWFA domain                                                                          | Thrombospondin, type I with vWFA domain   |
| 2.   | Hma2.229042 | 146   | Tetraspanin, extracellular domain or large extracellular loop (LEL), CD9/CD37/CD63 antigen | Tetraspanin, extracellular domain protein |
| 3.   | Hma2.217614 | 965   | MAM (14), Fibronectin Type II                                                              | MAM domain protein                        |
| 4.   | Hma2.203002 | 367   | Gal_Lectin <sup>(4)</sup> / SUEL lectin                                                    | Gal-lectin/ SUEL lectin                   |
| 5.   | Hma2.200137 | 1915  | Carbohydrate-binding WSC                                                                   | Carbohydrate-binding WSC domain protein   |

## Other Structural Proteins (9 proteins)

| S.No | Model Name  | Score | Domains                                                     | Annotation                                    |
|------|-------------|-------|-------------------------------------------------------------|-----------------------------------------------|
| 6.   | Hma2.213345 | 7641  | Myosin motor domain, type II, Myosin_tail_1                 | Myosin motor domain protein                   |
| 7.   | Hma2.230680 | 98    | WD40, DUF938, Methyltransf_12, Cytosolic fatty-acid binding | WD40 domain protein                           |
| 8.   | Hma2.217561 | 592   | Chitin-binding domain type 2 <sup>(4)</sup>                 | Chitin binding protein                        |
| 9.   | Hma2.229697 | 153   | Chitin_bind_3                                               | Chitin binding protein                        |
| 10.  | Hma2.211682 | 1129  | Fascin-like domain                                          | Fascin-like domain protein (PPOD2 peroxidase) |
| 11.  | Hma2.211683 | 2120  | Fascin-like domain                                          | Fascin-like domain protein                    |
| 12.  | Hma2.205478 | 2771  | Fascin-like domain                                          | Fascin-like domain protein                    |
| 13.  | Hma2.214493 | 227   | WD40 domain                                                 | WD40 domain protein                           |
| 14.  | Hma2.217613 | 1260  | MAM (15), Trefoil (P-type) <sup>(2)</sup>                   | Meprin, A5 protein                            |

## 2. Calcium Modulators (4 proteins)

| S.No | Model Name  | Score | Domains                                       | Annotation                                       |
|------|-------------|-------|-----------------------------------------------|--------------------------------------------------|
| 15.  | Hma2.208638 | 189   | MACPF, EGF_Ca                                 | MACPF domain protein                             |
| 16.  | Hma2.211735 | 2305  | Annexin <sup>(4)</sup>                        | Annexin                                          |
| 17.  | Hma2.210146 | 4829  | Calcium-binding EF-hand, Aldolase superfamily | Calcium-binding EF-hand protein                  |
| 18.  | Hma2.228383 | 465   | Annexin repeats (4), HMW glutenin             | Annexin repeats protein with HMW glutenin domain |

## 3. Venoms (9 proteins)

| S.No | Model Name  | Score | Domains                                                | Annotation                             |
|------|-------------|-------|--------------------------------------------------------|----------------------------------------|
| 19.  | Hma2.217198 | 326   | ZnMc_astacin-like, ShKT toxin                          | ShKT toxin domain protein              |
| 20.  | Hma2.231910 | 364   | SCP_GAPR-1-like                                        | SCP_GAPR-1-like protein                |
| 21.  | Hma2.219403 | 1066  | EF-hand <sup>(2)</sup>                                 | EF-hand, calcium binding motif protein |
| 22.  | Hma2.221233 | 77    | EF-hand <sup>(2)</sup>                                 | EF-hand, calcium binding motif protein |
| 23.  | Hma2.220229 | 223   | ZnMc_astacin-like                                      | Zinc Metallopeptidase protein          |
| 24.  | Hma2.220231 | 168   | Zn_Mc, astacin-like subfamily or peptidase family M12A | Zinc Metallopeptidase protein          |
| 25.  | Hma2.207911 | 182   | Peptidase M12A, astacin                                | Peptidase M12A, astacin protein        |
| 26.  | Hma2.203444 | 542   | Trypsin-like serine protease                           | Trypsin-like serine protease           |
| 27.  | Hma2.230838 | 888   | Trypsin-like serine protease domain in C-terminus      | Trypsin-like serine protease           |



## 4. Novel Proteins (7 proteins)

## Novel proteins type 1- unique to nematocyst proteome (5 proteins)

| S.No | Model Name  | Score | Domains              | Annotation |
|------|-------------|-------|----------------------|------------|
| 28.  | Hma2.215360 | 1136  | --                   | sT1NP30    |
| 29.  | Hma2.203001 | 127   | --                   | sT1NP34    |
| 30.  | Hma2.231389 | 680   | --                   | sT1NP38    |
| 31.  | Hma2.202690 | 100   | --                   | sT1NP39    |
| 32.  | Hma2.209593 | 513   | APPLE_Factor_XI-like | sT1NP40    |

## Novel proteins type 2 – exclusive to Hydra (1 protein)

| S.No | Model Name  | Score | Domains | Annotation |
|------|-------------|-------|---------|------------|
| 33.  | Hma2.215906 | 922   | --      | sT2NP8     |

## Novel proteins type 4 - not exclusive to Cnidaria (1 protein)

| S.No | Model Name  | Score | Domains | Annotation |
|------|-------------|-------|---------|------------|
| 34.  | Hma2.219109 | 486   | --      | sT4NP6     |

## 5. Peptidases (5 proteins)

## Metallopeptidases (3 proteins)

| S.No | Model Name  | Score | Domains                     | Annotation                    |
|------|-------------|-------|-----------------------------|-------------------------------|
| 35.  | Hma2.231450 | 216   | Peptidase_M1                | Peptidase_M1 protein          |
| 36.  | Hma2.217281 | 120   | ZnMc_MMP, PG_binding_1      | Zinc Metallopeptidase protein |
| 37.  | Hma2.231451 | 419   | Peptidase_M1 <sup>(2)</sup> | Peptidase M1 domain protein   |

## Serinepeptidases (1 protein)

| S.No | Model Name  | Score | Domains                     | Annotation            |
|------|-------------|-------|-----------------------------|-----------------------|
| 38.  | Hma2.228725 | 729   | Serine carboxypeptidase S28 | Peptidase S28 protein |

## Cysteinepeptidases (1 protein)

| S.No | Model Name  | Score | Domains                                                             | Annotation            |
|------|-------------|-------|---------------------------------------------------------------------|-----------------------|
| 39.  | Hma2.214055 | 602   | Peptidase_C1A, Inhibitor_I29, Cathepsin propeptide inhibitor domain | Peptidase C1A protein |

## 6. Metabolic Enzymes (5 proteins)

## Glycoside hydrolases (2 proteins)

| S.No | Model Name  | Score | Domains                                                                           | Annotation            |
|------|-------------|-------|-----------------------------------------------------------------------------------|-----------------------|
| 40.  | Hma2.212228 | 1116  | GH18_chitolectin_chitotriosidase, Glycoside hydrolase family 18, catalytic domain | Chitinase 1 precursor |
| 41.  | Hma2.208934 | 167   | Glyco_hydro_2_C, Glyco_hydro_2_N, Galactose-binding-like                          | Glucuronidase, beta   |

## Other Carbohydrate-modifying Enzymes (3 proteins)

| S.No | Model Name  | Score | Domains                                                   | Annotation                              |
|------|-------------|-------|-----------------------------------------------------------|-----------------------------------------|
| 42.  | Hma2.221275 | 150   | Alpha-L-arabinofuranosidase B                             | Alpha-L-arabinofuranosidase B protein   |
| 43.  | Hma2.225146 | 56    | AbfB, Alpha-L-arabinofuranosidase B (ABFB) <sup>(3)</sup> | Alpha-L-arabinofuranosidase B           |
| 44.  | Hma2.221421 | 1040  | FBP_aldolase_I_a, Fructose-1,6-bisphosphate aldolase      | Fructose-bisphosphate aldolase, class-I |

## 7. Other Enzymes (9 proteins)

## Peptidyl-prolyl cis-trans isomerase (3 proteins)

| S.No | Model Name  | Score | Domains                                                | Annotation                                           |
|------|-------------|-------|--------------------------------------------------------|------------------------------------------------------|
| 45.  | Hma2.225963 | 67    | FKBP_C, FKBP-type peptizing-prolyl cis-trans isomerase | Peptidyl-prolyl cis-trans isomerase protein          |
| 46.  | Hma2.211972 | 178   | FKBP-type peptidyl-prolyl cis-trans isomerase          | Peptidyl-prolyl cis-trans isomerase protein          |
| 47.  | Hma2.211965 | 626   | Peptidyl-prolyl cis-trans isomerase, cyclophilin-type  | cyclophilin-type peptidylprolyl cis- trans isomerase |

## ADP-ribosyl hydrolase (1 protein)

| S.No | Model Name  | Score | Domains                            | Annotation                  |
|------|-------------|-------|------------------------------------|-----------------------------|
| 48.  | Hma2.225914 | 102   | Rib_hydrolase, ADP-ribosyl cyclase | ADP-ribosyl cyclase protein |

## ATPase (1 protein)

| S.No | Model Name  | Score | Domains        | Annotation             |
|------|-------------|-------|----------------|------------------------|
| 49.  | Hma2.203093 | 2223  | F1-ATPase_beta | F1-ATPase_beta protein |

## Ungrouped Enzymes (4 protein)

| S.No | Model Name  | Score | Domains                                          | Annotation                                     |
|------|-------------|-------|--------------------------------------------------|------------------------------------------------|
| 50.  | Hma2.231407 | 593   | RNase_T2_euk, Ribonuclease T2                    | Rnase_T2 protein                               |
| 51.  | Hma2.228164 | 501   | MDH_cytoplasmic_cytosolic, malate dehydrogenases | MDH_cytoplasmic_cytosolic malate dehydrogenase |
| 52.  | Hma2.200322 | 51    | Electrontransport oxidoreductase                 | acyl-Coenzyme A dehydrogenase                  |
| 53.  | Hma2.223427 | 688   | F1_ATPase_alpha                                  | F1 ATPase protein                              |

## 8. Ungrouped Proteins (12 proteins)

| S.No | Model Name  | Score | Domains                                                             | Annotation                                |
|------|-------------|-------|---------------------------------------------------------------------|-------------------------------------------|
| 54.  | Hma2.220294 | 420   | Ribophorin_II                                                       | Ribophorin_II protein                     |
| 55.  | Hma2.217685 | 53    | GM2 activator protein (GM2-AP)                                      | GM2 activator protein (GM2-AP) protein    |
| 56.  | Hma2.207472 | 216   | SOUL heme-binding protein                                           | SOUL heme-binding protein                 |
| 57.  | Hma2.209240 | 203   | Translocon-associated protein, delta subunit precursor (TRAP-delta) | Translocon-associated protein 1           |
| 58.  | Hma2.234288 | 314   | TRAP_beta                                                           | TRAP_beta domain protein                  |
| 59.  | Hma2.212036 | 153   | GM2-AP                                                              | GM2 activator protein                     |
| 60.  | Hma2.215378 | 780   | GST_N_Metaxin-like/ Thioredoxin-like fold                           | GST_N_Metaxin-like protein                |
| 61.  | Hma2.227465 | 1292  | 14-3-3 protein                                                      | 14-3-3 protein                            |
| 62.  | Hma2.223439 | 987   | Eukaryotic porin                                                    | Voltage-dependent anion channel 2 related |
| 63.  | Hma2.215915 | 51    | Phosphatidylinositol transfer protein                               | Phosphatidylinositol transfer protein     |
| 64.  | Hma2.232227 | 333   | Mito_carr /TM                                                       | Solute carrier family 25 protein          |
| 65.  | Hma2.228538 | 834   | Mito_carr <sup>(3)</sup>                                            | ADP/ATP-translocator protein              |
