# Supplementary material
Source: PubMed Central journal article supplement (PMC3323026)
Supplement: supp_M111.328203_jbc.M111.328203-2.pdf [file supp_M111.328203_jbc.M111.328203-2.pdf]

A

(+)

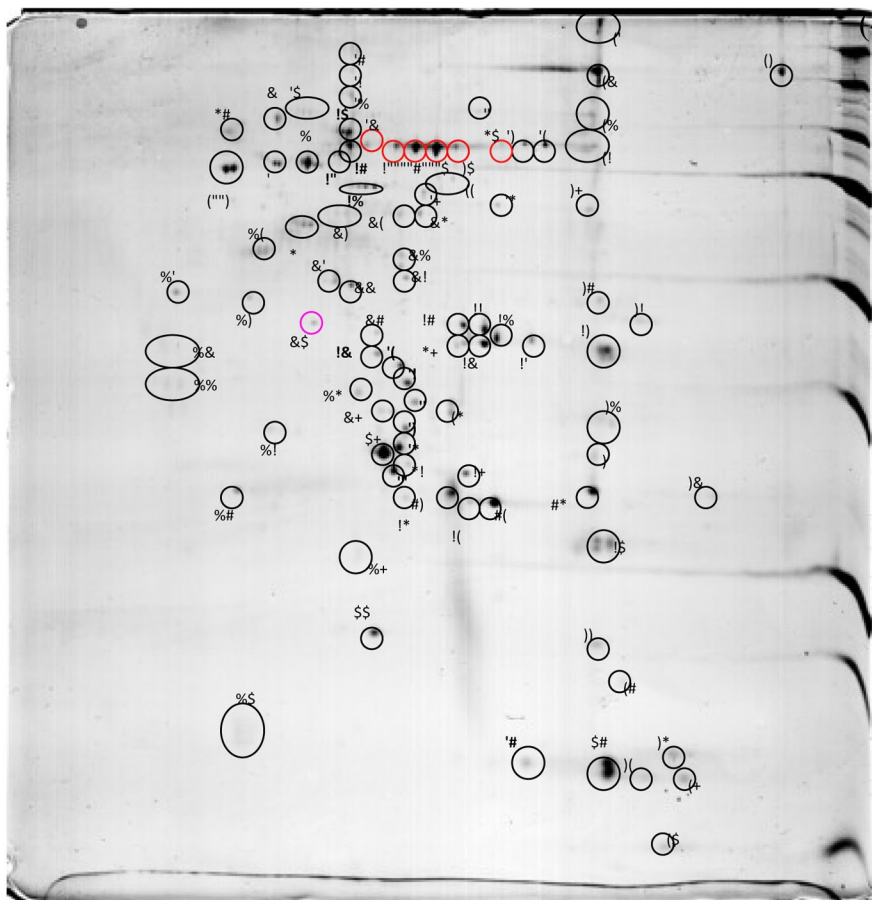

- 250 1,2,3 NOWA  
 150 6 T1NP2  
 11 Nematocalcin  
 12 PLA2\_bee\_venom\_like protein  
 15 EGF\_Ca domain protein  
 16 EGF\_Ca domain protein  
 17 EGF-Ca domain protein  
 20 WD40 domain protein  
 21 WD40 domain protein  
 23 D-galactoside/L-rhamnose binding SUEL lectin  
 26 HyDKK3  
 28 Carbonic anhydraseVII  
 29 sT1NP23  
 31 Zinc Metallopeptidase protein  
 31 T3NP protein  
 33 Alpha Carbonic Anhydrase protein  
 34 Gamma-glutamyltranspeptidase  
 35 Alpha Carbonic Anhydrase protein  
 36 Gamma-glutamyltranspeptidase  
 37 Cnidoin  
 38 Alpha Carbonic Anhydrase protein  
 38 Zinc Metallopeptidase protein  
 40 PLA2\_bee\_venom\_like protein  
 46 sT1NP21  
 47 SCP-like extracellular protein  
 51 Actin  
 54 Seven domain Protein  
 55 Peptidase M14 protein  
 56 Arylsulfatase A  
 60 Glycoside Hydrolase 20  
 61 BPTI / Kunitz family, Thyroglobulin type I repeat protein  
 62 Rajakutty protein  
 65 NOWA  
 66 Peptidase M1 domain protein  
 67 Hepta Gal-lectin  
 68 Hepta Gal-lectin  
 69 Peptidase\_M13 protein  
 70 Peptidase\_M13 protein  
 71 NOWA  
 73 Zinc Metallopeptidase protein  
 76 Alpha Carbonic Anhydrase protein  
 77 WD40 domain protein  
 77 PLA2\_bee\_venom\_like protein  
 83 Hepta Gal-lectin  
 84 Peptidase M1 domain protein  
 85 C-Lectin domain protein  
 88 MACPF domain protein  
 89 Geeta protein  
 90 Gamma-glutamyltranspeptidase  
 91 NOWA

pI 3 - 10
