# Supplementary material
Source: PubMed Central journal article supplement (PMC3323026)
Supplement: supp_M111.328203_jbc.M111.328203-3.pdf [file supp_M111.328203_jbc.M111.328203-3.pdf]

## **SUPPLEMENTARY FIGURE LEGENDS**

Supplementary Fig. 1. 2D gel resolution of the nematocyst proteome. A, 2D resolution of nematocyst proteins in the pellet fraction. NOWA as a bona fide capsule antigen and actin as a major cellular contaminant are indicated (red and magenta circles, respectively). B, 2D resolution of nematocyst proteins in the pellet fraction.
